# Supplementary material for: Trametinib modulates cancer multidrug resistance by targeting ABCB1 transporter
Source: PubMed Central journal article supplement (PMC4558166; doi:10.18632/oncotarget.3820), 2015-04-14
Supplement: oncotarget-06-15494-s001.pdf [file oncotarget-06-15494-s001.pdf]

## Trametinib modulates cancer multidrug resistance by targeting ABCB1 transporter

### Supplementary Material

**Supplementary Table 1: Summary of the potential residues in transmembrane (TM) domains of ABCB1 interacting with Trametinib in comparison with QZ59-RRR, QZ59-SSS and verapamil.**

| TM        | Residue | QZ59-RRR | QZ59-SSS | Verapamil | Trametinib |
|-----------|---------|----------|----------|-----------|------------|
| <b>1</b>  | His 60  |          |          | x         |            |
|           | Ala 63  |          |          | x         |            |
|           | Leu 64  | x        | x        | x         |            |
|           | Met 67  |          | x        |           |            |
|           | Met 68  | x        | x        |           | x          |
|           | Phe 71  | x        | x        |           |            |
| <b>2</b>  | Tyr114  |          | x        |           |            |
|           | Val121  |          |          | x         |            |
| <b>4</b>  | Ser218  |          |          | x         |            |
| <b>5</b>  | Met295  |          | x        |           |            |
|           | Phe299  |          | x        |           | x          |
|           | Ile302  |          | x        | x         | x          |
|           | Tyr303  |          | x        |           | x          |
|           | Tyr306  | x        | x        |           | x          |
|           | Phe331  |          |          |           | x          |
| <b>6</b>  | Phe 332 | x        | x        |           | x          |
|           | Leu 335 |          | x        | x         | x          |
|           | Ile 336 | x        | x        |           | x          |
|           | Ala 338 |          |          | x         |            |
|           | Phe 339 | x        | x        |           |            |
|           | Asn 717 |          | x        |           | x          |
| <b>7</b>  | Gly718  |          |          |           | x          |
|           | Gln 721 | x        | x        |           | x          |
|           | Phe 724 | x        | x        | x         | x          |
|           | Ala725  |          |          | x         | x          |
|           | Phe 728 | x        | x        |           | x          |
|           | Phe 766 |          | x        |           |            |
| <b>9</b>  | Gln834  |          |          |           | x          |
|           | Ala837  |          |          | x         |            |
|           | Asn838  |          |          | x         | x          |
| <b>10</b> | Ile 864 |          |          | x         |            |
|           | Ala 867 |          |          | x         |            |
|           | Gly 868 |          |          | x         |            |
| <b>11</b> | Phe938  |          |          | x         |            |
|           | Thr941  |          |          | x         |            |
|           | Met945  |          | x        |           |            |
|           | Tyr949  | x        | x        |           | x          |
|           | Phe953  |          | x        |           |            |
| <b>12</b> | Leu 971 |          | x        | x         |            |
|           | Phe 974 | x        | x        |           |            |
|           | Ser 975 | x        |          |           | x          |
|           | Val 978 |          |          | x         |            |

|  |         |   |   |   |   |
|--|---------|---|---|---|---|
|  | Phe979  | x | x |   | x |
|  | Gly 980 |   |   | x |   |
|  | Ala 981 |   |   | x |   |
|  | Met 982 | x | x |   | x |
|  | Ala983  | x | x |   | x |
|  | Gln 986 | x | x |   | x |
|  | Val987  |   | x |   | x |
